# Supplementary material for: Boosting the biosynthesis of betulinic acid and related triterpenoids in Yarrowia lipolytica via multimodular metabolic engineering
Source: PubMed Central journal article supplement (PMC6498500; doi:10.1186/s12934-019-1127-8), 2019-05-03
Supplement: 12934_2019_1127_MOESM5_ESM.pdf [file 12934_2019_1127_MOESM5_ESM.pdf]

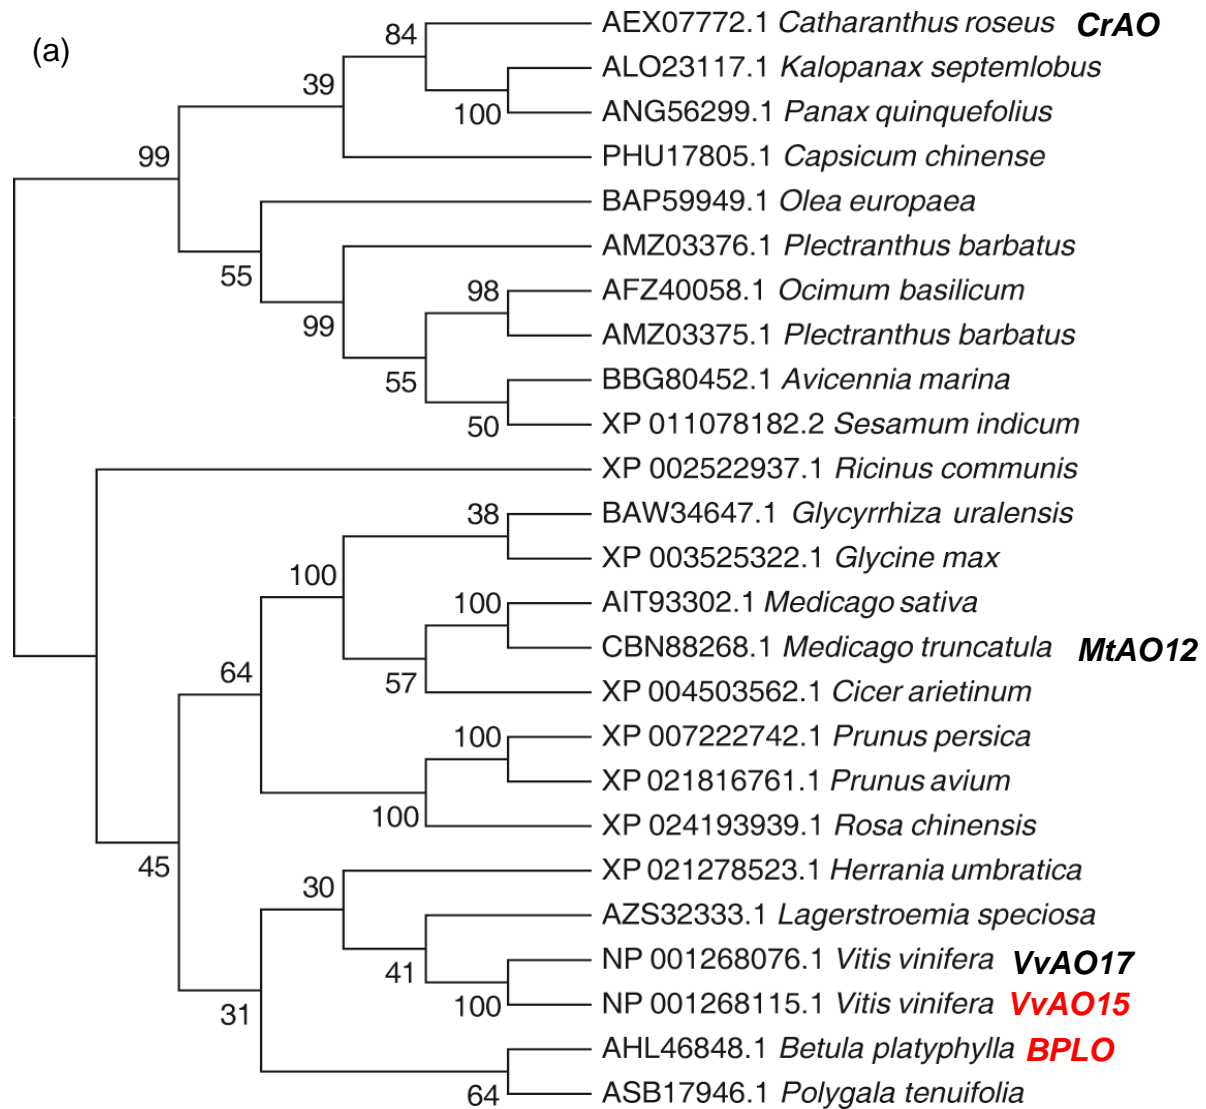

(b)

| Gene          | Accession      | source                     | Total score | Identity |
|---------------|----------------|----------------------------|-------------|----------|
| <i>BPLO</i>   | AHL46848.1     | <i>Betula platyphylla</i>  | 997         | 100%     |
| <i>VvAO15</i> | NP_001268115.1 | <i>Vitis vinifera</i>      | 833         | 81.04%   |
| <i>VvAO17</i> | NP_001268076.1 | <i>Vitis vinifera</i>      | 817         | 81.25%   |
| <i>MtAO12</i> | CBN88268.1     | <i>Medicago truncatula</i> | 796         | 78.50%   |
| <i>CrAO</i>   | AEX07772.1     | <i>Catharanthus roseus</i> | 785         | 78.91%   |
