# Supplementary material for: Boosting the biosynthesis of betulinic acid and related triterpenoids in Yarrowia lipolytica via multimodular metabolic engineering
Source: PubMed Central journal article supplement (PMC6498500; doi:10.1186/s12934-019-1127-8), 2019-05-03
Supplement: 12934_2019_1127_MOESM6_ESM.pdf [file 12934_2019_1127_MOESM6_ESM.pdf]

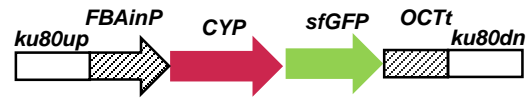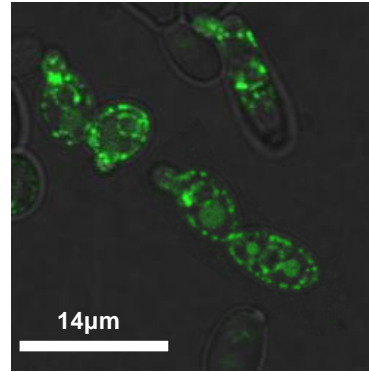

**BPLO-sfGFP**

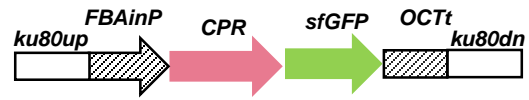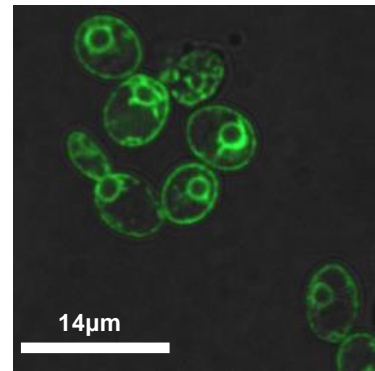

**LjCPR-sfGFP**

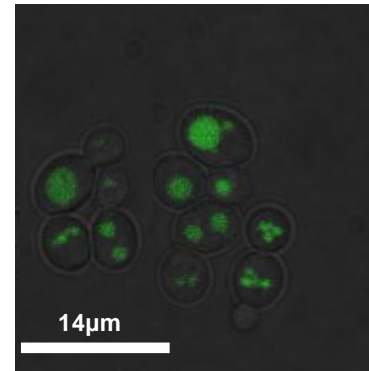

**MTR-sfGFP**
